# Supplementary material for: A comparative study on the efficacy of different probes to predict the photo-activity of nano-titanium dioxide toward biomolecules
Source: Royal Society of Chemistry journal article supplement (doi:10.1039/c5ra14303a), 2015-01-01
Supplement: c5ra14303a1.pdf [file c5ra14303a1.pdf]

**A comparative study on the efficacy of different probes to predict the photo-activity of nano-titanium dioxide toward biomolecules**

*Marucco et al.*

## **Supplementary information**

## Summary of the content

|                                                                                         |   |
|-----------------------------------------------------------------------------------------|---|
| 1. X-ray diffractograms .....                                                           | 3 |
| 2. $\zeta$ potential as a function of pH.....                                           | 3 |
| 3. UV-Vis spectra of the product of degradation of linoleic acid and 2-deoxyribose..... | 4 |
| 4. UV-Vis spectra of the product of degradation of rhodamine B.....                     | 5 |
| 5. Simulation of EPR spectra.....                                                       | 6 |
| 6. Hyperfine splitting constant of the radical species .....                            | 7 |
| 7. Summary of the experimental conditions.....                                          | 8 |

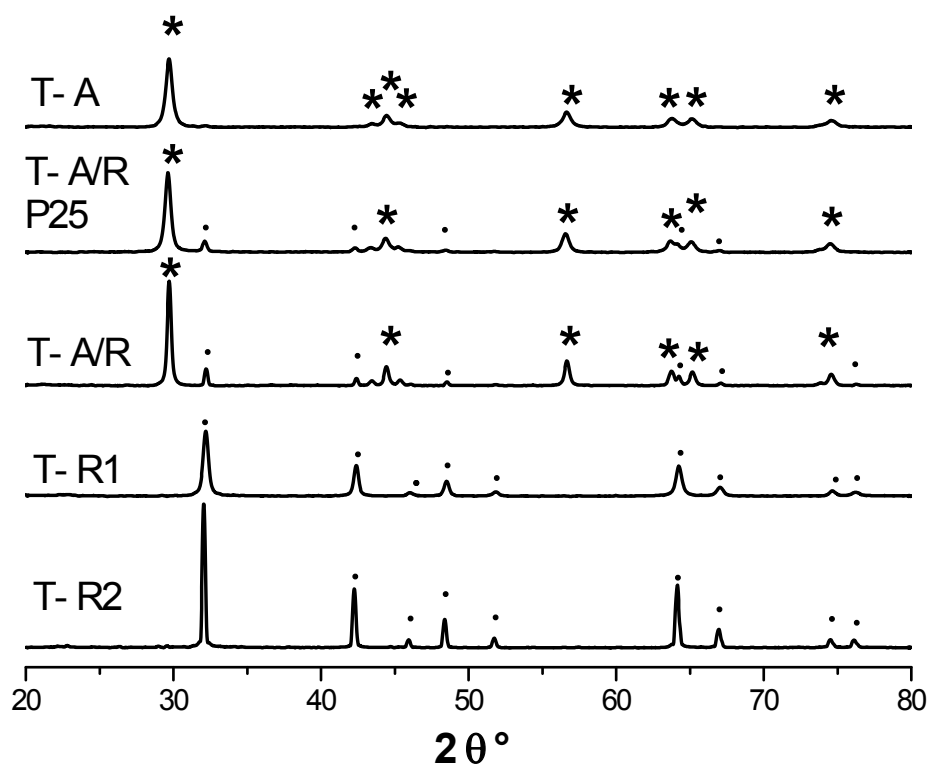

**Figure S 1.** X-ray diffractograms of the TiO<sub>2</sub> powders in the 20-80 = 2θ range. The peaks of anatase (\*) and rutile (o) are showed above the diffractograms

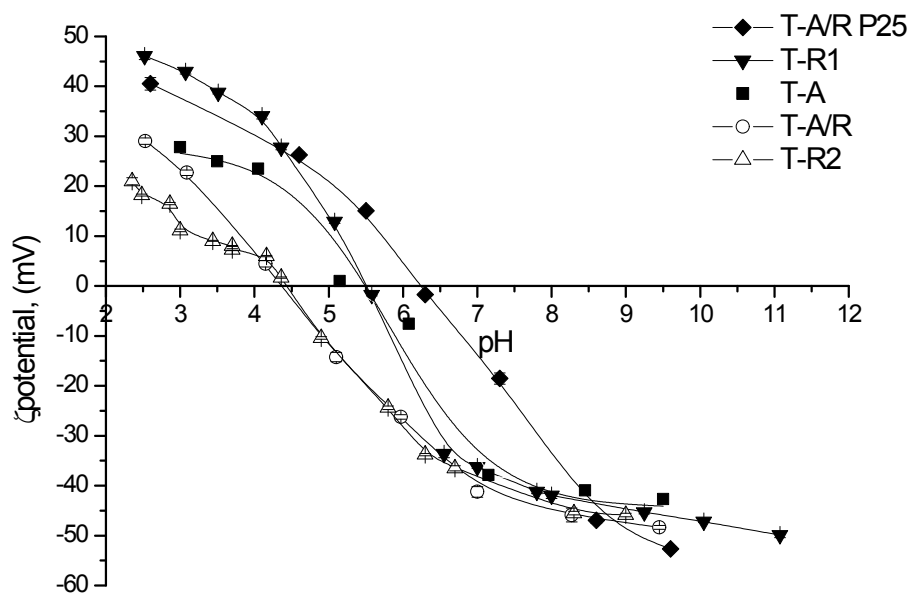

**Figure S2.** ζ potential as a function of pH of the TiO<sub>2</sub> powders.

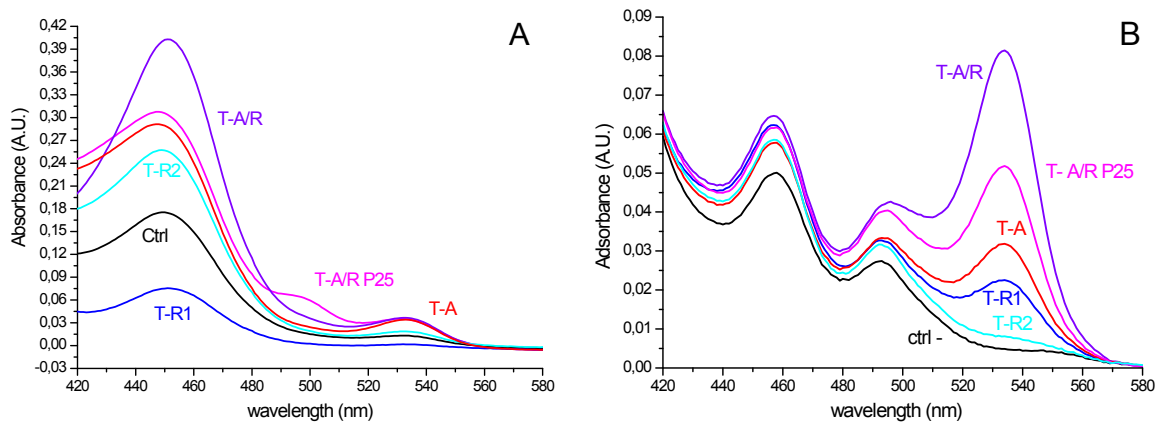

**Figure S3.** Degradation of A) linoleic acid; B) 2-deoxyribose. Representative UV/vis spectra after 1h of irradiation. The pick at 535 nm corresponds to the TBA adduct of MDA, while pick at 455 nm and 500 nm are due to the formation of other TBA-reactive species (TBARS) like mono-aldehydes (J. A. Knight, R. K. Pleper, L. McClellan, *Clinical Chemistry* 1988, **34**, 2433-2438.)

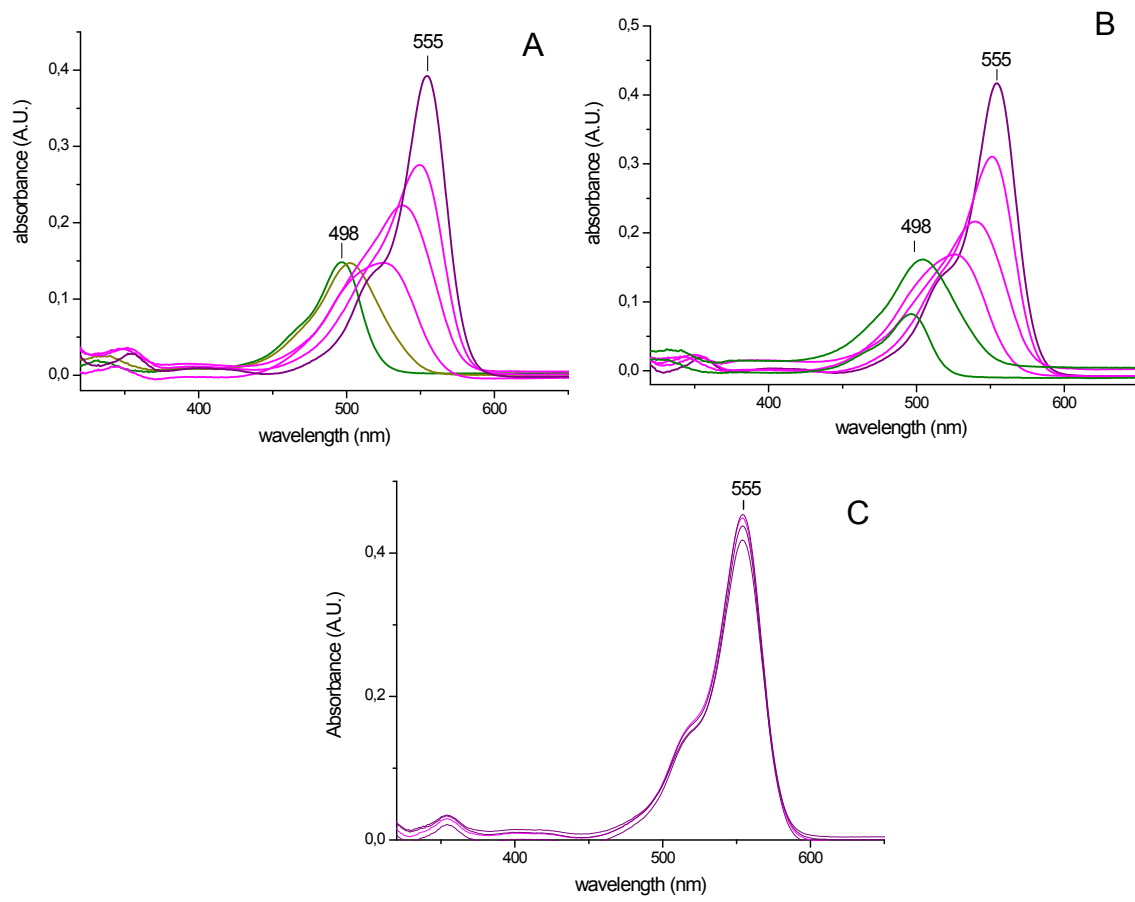

**Figure S4.** Degradation of rhodamine B. Representative **Uv-vis** spectra recoded at 90 minutes for (A)T-A; (B) T-A/R; (C) T-R2

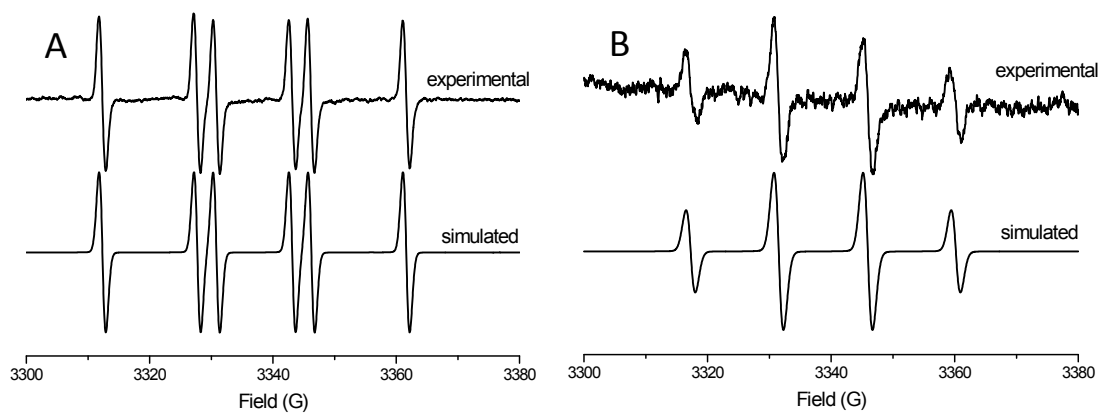

**Figure S5.** Experimental and simulated EPR spectra of DMPO adducts. (A) DMPO/CO<sub>2</sub><sup>·-</sup>; (B) DMPO/HO<sup>·</sup>.

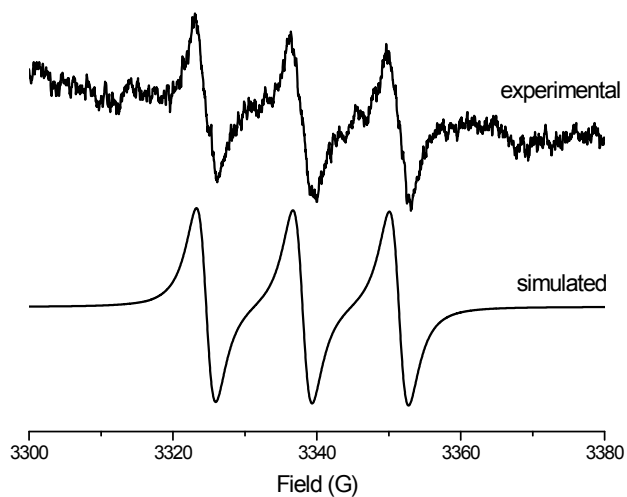

**Figure S6.** Experimental and simulated EPR spectra of PBN/O<sub>2</sub><sup>·-</sup> adduct.

**Table 1S. Hyperfine splitting constants of the radicals species detected**

| Radical specie                                             | Solvent                  | Hyperfine splitting constants |
|------------------------------------------------------------|--------------------------|-------------------------------|
| DMPO/HO·                                                   | 100 mM PB pH 7.4         | $A_H$ 14.1G; $A_N$ 14.4G;     |
| DMPO/CO <sub>2</sub> · <sup>-</sup>                        | 125 mM PB pH 7.4         | $A_H$ 15.4 G; $A_N$ 18.5 G;   |
| PBN/O <sub>2</sub> · <sup>-</sup><br>PBN/HO <sub>2</sub> · | cyclohexane              | $A_N$ 13.5 G;                 |
| TEMPONE                                                    | cyclohexane              | $A_N$ 14.0 G;                 |
| TEMPONE<br>(from TMP)                                      | water                    | $A_N$ 15.7 G;                 |
| TEMPONE<br>(from TMPONE-H)                                 | water                    | $A_N$ 15.7 G;                 |
| TEMPONE<br>(from TMPONE-H)                                 | phosphate buffer, pH 7.4 | $A_N$ 15.7 G;                 |

**Table 2S. Summary of the experimental conditions.**

| <b>Target molecule</b>      | <b>Spin trapping/probe</b> | <b>Reactive specie/product detected</b> | <b>Solvent /buffer</b> | <b>pH</b> | <b>exposed surface area of TiO<sub>2</sub> m<sup>2</sup>/ml</b> |
|-----------------------------|----------------------------|-----------------------------------------|------------------------|-----------|-----------------------------------------------------------------|
| Rhodamine B                 | -                          | -                                       | H <sub>2</sub> O       | 5-6       | 0.105                                                           |
| H <sub>2</sub> O            | DMPO<br><i>35 mM</i>       | HO·                                     | PB<br><i>100mM</i>     | 7-7.4     | 1.12                                                            |
| HCOOH<br><i>1M</i>          | DMPO<br><i>75 mM</i>       | CO <sub>2</sub> · <sup>-</sup>          | PB<br><i>125mM</i>     | 7-7.4     | 2.8                                                             |
| -                           | TEMPONE-H<br><i>50μM</i>   | TEMPONE                                 | H <sub>2</sub> O       | 4-6       | 0.7                                                             |
| -                           | TEMPONE-H<br><i>50μM</i>   | TEMPONE                                 | PB<br><i>10mM</i>      | 7-7.4     | 0.7                                                             |
| O <sub>2</sub>              | 4-oxoTMP<br><i>50mM</i>    | TEMPONE                                 | cyclohexane            | -         | 1.4                                                             |
| O <sub>2</sub>              | 4-oxo TMP<br><i>50mM</i>   | TEMPONE                                 | PB<br><i>10mM</i>      | 9         | 0.7                                                             |
| O <sub>2</sub>              | PBN<br><i>20mM</i>         | O <sub>2</sub> · <sup>-</sup>           | cyclohexane            | -         | 0.18                                                            |
| linoleic acid<br><i>1mM</i> | -                          | MDA                                     | PB<br><i>10mM</i>      | 7-7.4     | 1.05                                                            |
| 2-deoxyribose<br><i>1mM</i> | -                          | MDA                                     | PB<br><i>10mM</i>      | 7-7.4     | 1.05                                                            |
